# Supplementary material
Source: PubMed Central journal article supplement (PMC3323058)
Supplement: supp_M111.326587_jbc.M111.326587-1.pdf [file supp_M111.326587_jbc.M111.326587-1.pdf]

## Supplemental Data

Fig. S1. **Double reciprocal plot of the effect of acetyl-CoA concentration on hNaa50p NAT activity at different peptide concentrations.** The  $^1\text{MLGP-RRR}^{24}$  concentrations were ( $\circ$ ) 37  $\mu\text{M}$ , ( $\bullet$ ) 75  $\mu\text{M}$ , ( $\square$ ) 150  $\mu\text{M}$ , or ( $\blacksquare$ ) 300  $\mu\text{M}$ .

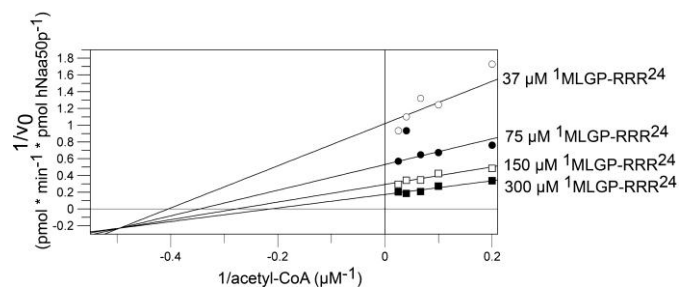

**Fig. S2. Double reciprocal plot of effect of acetyl-CoA concentration on hNaa50p NAT activity in the presence of the reaction product CoA and the dead-end analogue desulfo-CoA.** **A.** The reactions were conducted in 50 mM Tris-HCl (pH 8.5), 50 nM purified GST-hNaa50p and  $1 \times K_m$  (80  $\mu\text{M}$ ) of  $^1\text{MLGP-RRR}^{24}$ . The acetyl-CoA concentration varied from 2 to 25  $\mu\text{M}$ . The CoA concentrations were: ( $\circ$ ) 0  $\mu\text{M}$ , ( $\bullet$ ) 15  $\mu\text{M}$ , ( $\square$ ) 40  $\mu\text{M}$ , or ( $\blacksquare$ ) 80  $\mu\text{M}$ . **B.** The reactions were performed as described for A, except CoA was replaced with desulfo-CoA at: ( $\circ$ ) 0  $\mu\text{M}$ , ( $\bullet$ ) 10  $\mu\text{M}$ , ( $\square$ ) 20  $\mu\text{M}$ , or ( $\blacksquare$ ) 60  $\mu\text{M}$ .

A

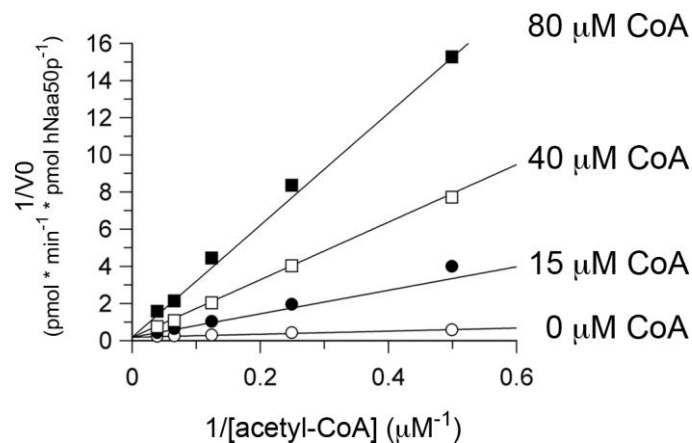

B

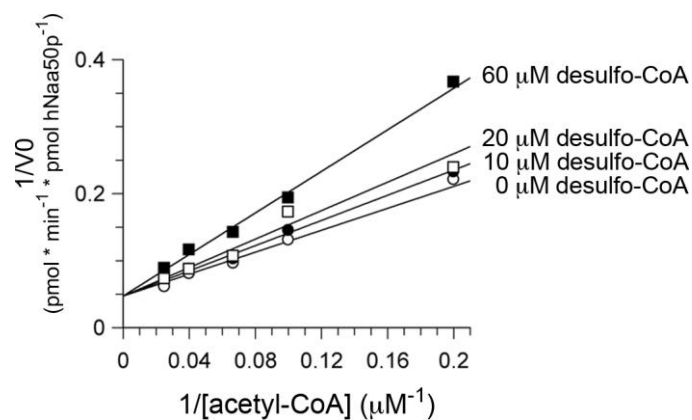

Fig. S3. **Double reciprocal plot of effect of peptide substrate concentration on hNaa50p NAT activity in the presence of the reaction product CoA.** Reactions were conducted in 50 mM Tris-HCl (pH 8.5) with 30 nM purified GST-hNaa50p and 100  $\mu$ M acetyl-CoA. The  $^1$ MLGP-RRR $^{24}$  concentrations varied from 30 to 500  $\mu$ M. CoA concentrations were: ( $\circ$ ) 0  $\mu$ M, ( $\bullet$ ) 15  $\mu$ M, ( $\square$ ) 40  $\mu$ M, or ( $\blacksquare$ ) 80  $\mu$ M.

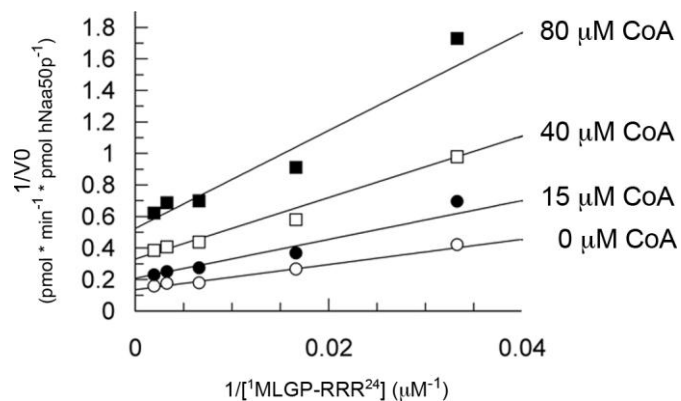

Fig. S4A. **Product inhibition using acetylated peptide against peptide substrate.** No significant inhibition was observed using acetylated peptides as product inhibitors, against  $^1\text{MLGP-RRR}^{24}$ . The concentration of fixed substrate (acetyl-CoA) was at approximately  $1xK_m = 10 \mu\text{M}$ .

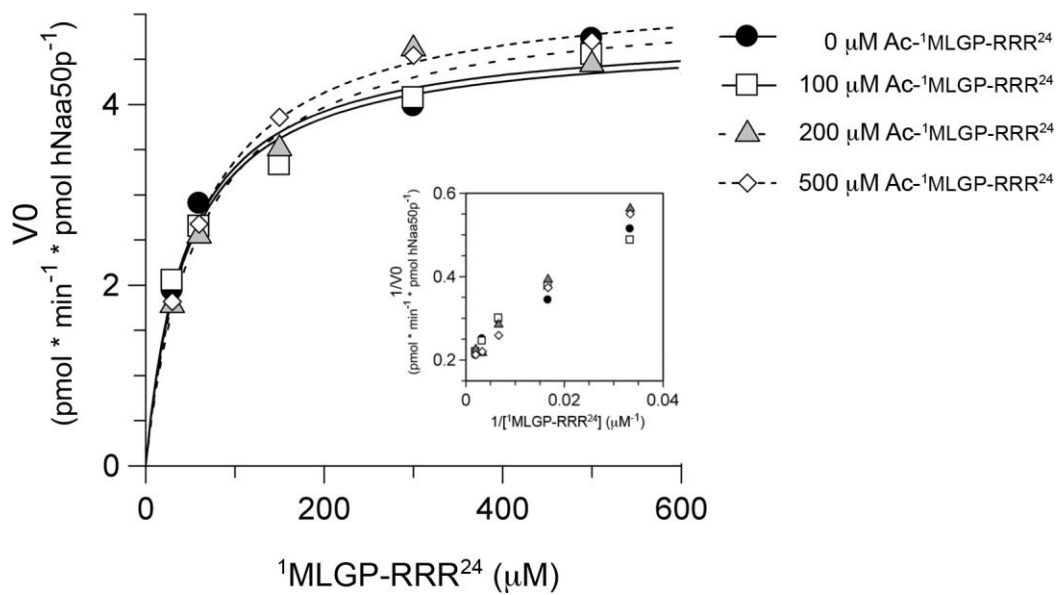

Fig. S4B. **Product inhibition using acetylated peptide against acetyl-CoA as variable substrate.** No significant inhibition was observed using acetylated peptides as product inhibitors against the substrate acetyl-CoA. The concentration of fixed substrate ( $^1\text{MLGP-RRR}^{24}$ ) was at approximately  $1 \times K_m = 80 \mu\text{M}$ .

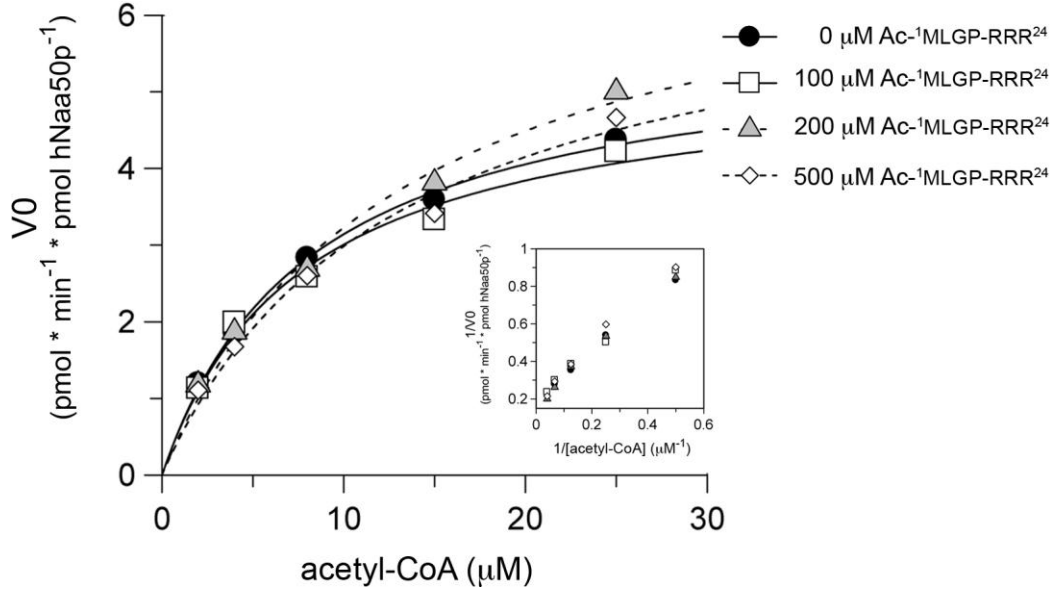

For two substrate double reciprocal plots, initial rates were fit by a nonlinear approach to either, Eq 1 (parallel line pattern),

$$v = \frac{V_{\text{MAX}} \times [\text{acCoA}] \times [^1\text{MLGP-RRR}^{24}]}{K_b \times [\text{acCoA}] + K_a \times [^1\text{MLGP-RRR}^{24}] + [\text{acCoA}] \times [^1\text{MLGP-RRR}^{24}]},$$

where  $K_a$  is the  $K_m$  of acetyl-CoA, and  $K_b$  is the  $K_m$  of  $^1\text{MLGP-RRR}^{24}$ , or

Eq2:

$$v = \frac{V_{\text{MAX}} \times [\text{acCoA}] \times [^1\text{MLGP-RRR}^{24}]}{\alpha K_a \times K_b + K_b \times [\text{acCoA}] + K_a \times [^1\text{MLGP-RRR}^{24}] + [\text{acCoA}] \times [^1\text{MLGP-RRR}^{24}]},$$

where  $K_a$  is the  $K_m$  of acetyl-CoA, and  $K_b$  is the  $K_m$  of  $^1\text{MLGP-RRR}^{24}$ ,  $\alpha$  is the interaction factor for the peptide binding to the enzyme-acetyl-CoA complex.

For competitive inhibition, the initial velocity data were fit to

Eq 3:

$$v = \frac{V_{\text{MAX}} \times [S]}{K_m \left( 1 + \frac{[I]}{K_i} \right) + [S]}, \text{ where } K_i \text{ is the inhibitor constant and } V_{\text{MAX}} \text{ is the apparent maximal velocity.}$$

For non-competitive inhibition, initial velocity data were fit to

Eq 4:

$$v = \frac{V_{\text{MAX}} \times [\text{S}] \times \left( \frac{1}{1 + \frac{[\text{I}]}{K_i}} \right)}{K_m + [\text{S}]}, \quad V_{\text{MAX}} \text{ is the apparent maximal velocity.}$$

All of the above fits of the data were made using the GraFit ver. 7 software package.

Fig. S5. **The secondary structure composition of hNaa50p in complex with acetyl-CoA determined using the chemical shift index (CSI).**  $C^\alpha$  (brown) and  $C'$  (light green) chemical shift deviations in ppm compared to their random coil values are plotted against the amino acid sequence numbers. The values between the horizontal lines indicate random coil values. More than three consecutive amino acids with a shift deviation above 0.7 ppm ( $C^\alpha$ ) and 0.5 ppm ( $C'$ ) respectively are most likely situated in an  $\alpha$ -helix, whereas more than three consecutive amino acids with a shift deviation below these values are most likely positioned in  $\beta$ -strands. According to this simple approximation, hNaa50p contains four helices (indicated by boxes) at the following sequence positions: 17-26 (this helix might already start at His14), 33-38, 87-104 and 118-126. In addition, hNaa50p is characterized by some long range  $\beta$ -strands (indicated by arrows). The strands are situated at the following positions: 5-9 (probably extended to Thr12), three consecutive strands interrupted with turns at 46-74, 108-111, and three consecutive strands interrupted with turns at 129-156. The secondary structures derived from solution NMR are overall in good agreement with the positions of the secondary structures observed in the hNaa50p-acetyl-CoA complex in a single crystal (PDB ID 2OB0). Note that the second to last strand might be an artefact caused by reduced flexibility in the structure in that particular region.

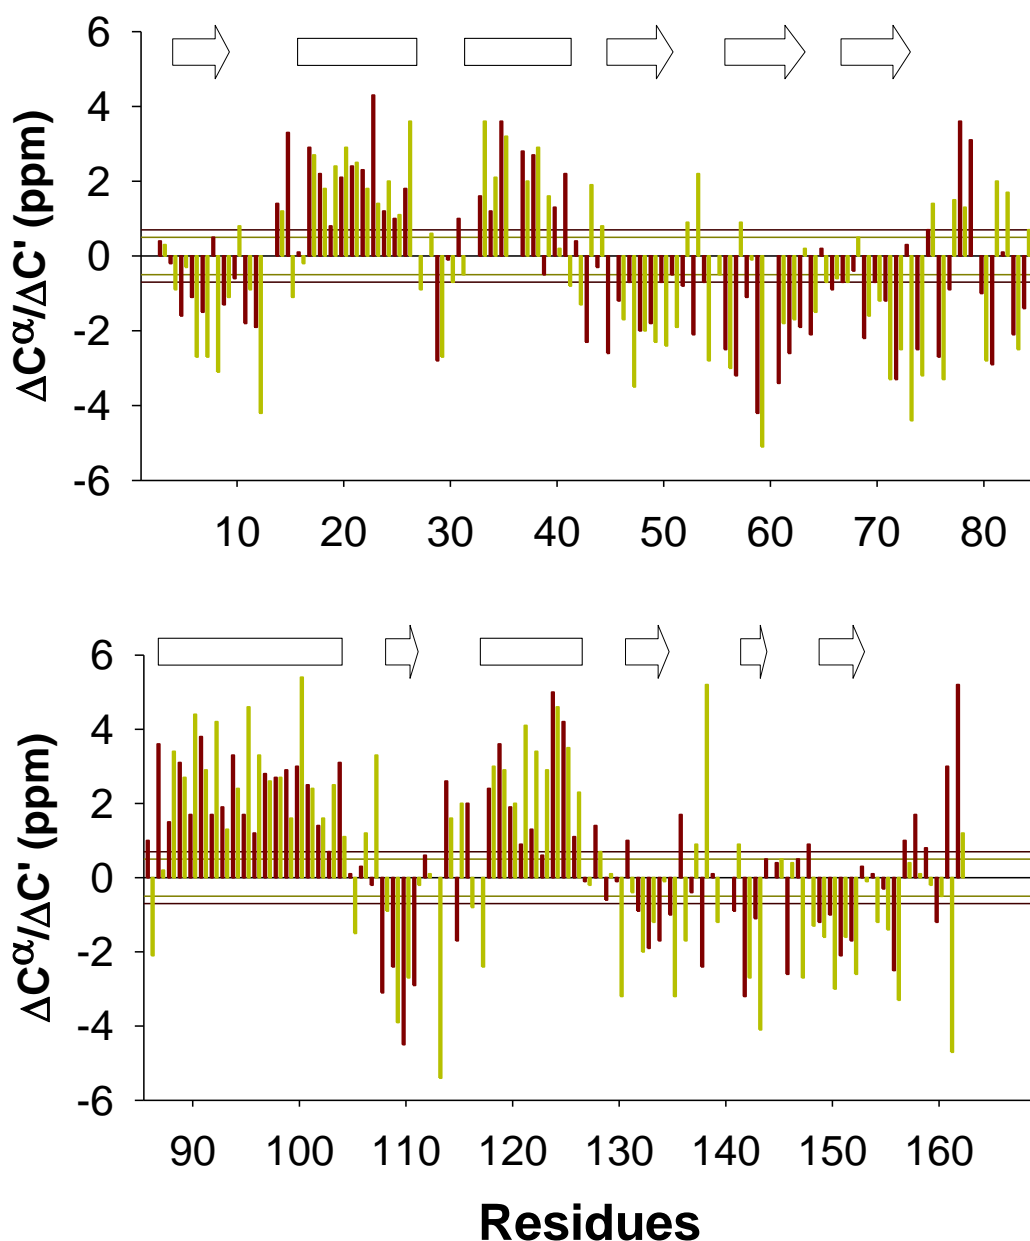

Fig. S6.

**A.** Overlay of two expanded regions of the 2D  $^1\text{H}$ - $^{15}\text{N}$  HMQC spectrum of hNaa50p (black) and hNaa50p with peptide (green). **B.** Overlay of the HMQC spectra of hNaa50p with CoA (black) and hNaa50p with CoA and peptide (blue). **C.** Overlay of the HMQC spectra of hNaa50p with CoA (black) and hNaa50p with CoA and acetylated peptide (blue). Only peaks that show significant chemical shift changes upon binding are assigned in panels **B** and **C**. Peaks with unknown identity are indicated with a red asterisk.

**A** E vs E- $^1\text{MLGP-RRR}^{24}$

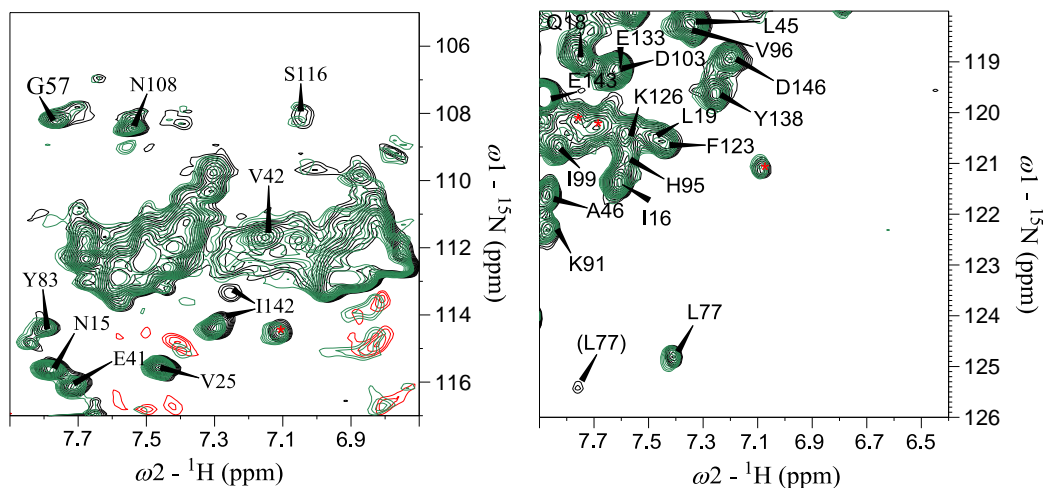

**B** E-CoA vs E-CoA- $^1\text{MLGP-RRR}^{24}$

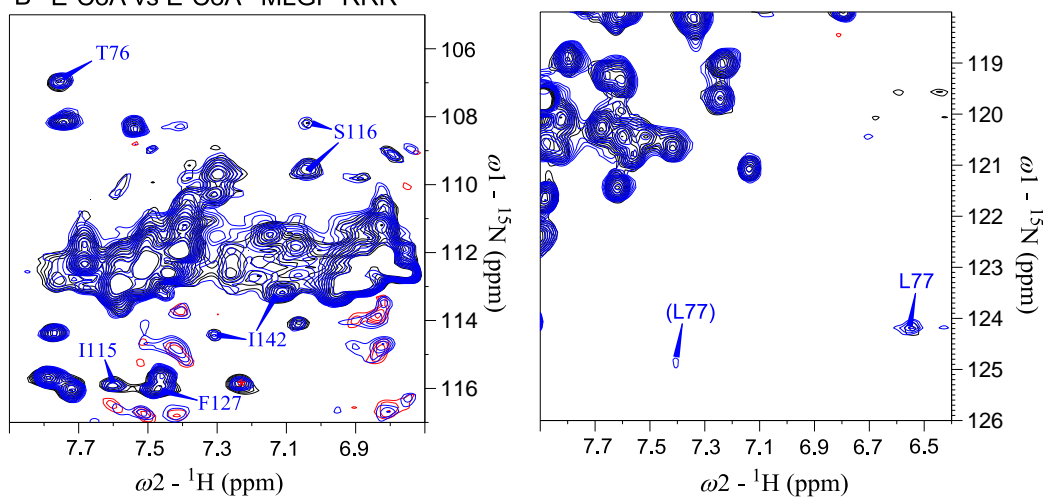

**C** E-CoA vs E-CoA-Ac $^1\text{MLGP-RRR}^{24}$

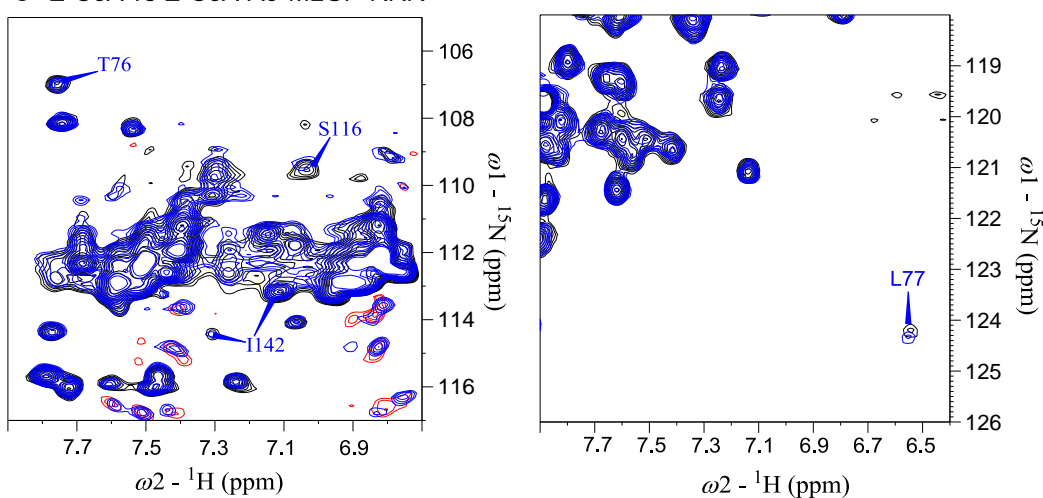



Fig. S7.

**A.** Overlay of two expanded regions of the 2D  $^1\text{H}$ - $^{15}\text{N}$  HMQC spectra of hNaa50p with CoA and acetylated peptide (black) and hNaa50p with CoA and peptide (blue) at 310 K. The peaks of the former spectrum coincide with those of the hNaa50p-CoA complex. The second peak for Tyr73 that is observed for hNaa50p in complex with CoA and  $^1\text{MLGP-RRR}^{24}$  coincides with the peak in the spectrum of the hNaa50p-acetyl-CoA complex. **B.** Overlay of two expanded regions of the 2D  $^1\text{H}$ - $^{15}\text{N}$  HMQC spectra of the hNaa50p H112A mutant with acetyl-CoA (black) and the mutant in the presence of both acetyl-CoA and peptide (blue) at 298 K. The chemical shifts of Tyr110 and Lys135 change slightly in the presence of both substrates, whereas the position and intensities of two of the three peaks of Tyr73 differ between the two spectra.

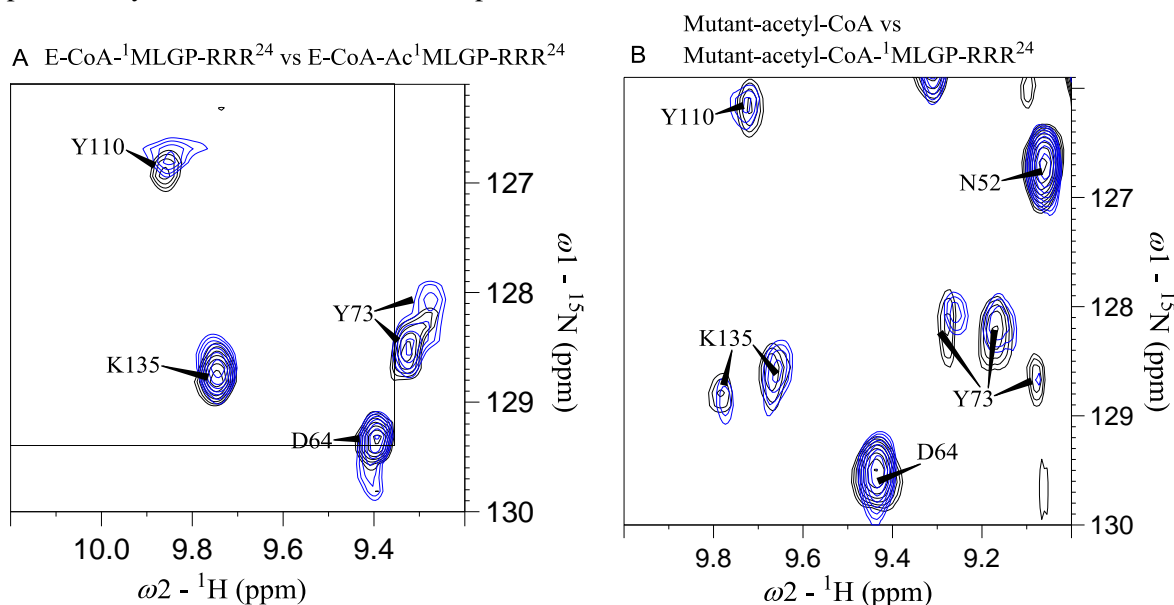

Fig. S8.

**A.** Expanded region of the 2D  $^1\text{H}$ - $^{15}\text{N}$  HMQC spectrum of hNaa50p (black) and hNaa50p with acetyl-CoA (blue) containing Tyr124. **B.** Positioning of Tyr124 and Leu77 to each other and to acetyl-CoA (blue) in the crystal structure of the hNaa50p-acetyl-CoA complex. The structure was created with the PyMOL Molecular Graphics System, Version 1.3, Schrödinger, LLC.

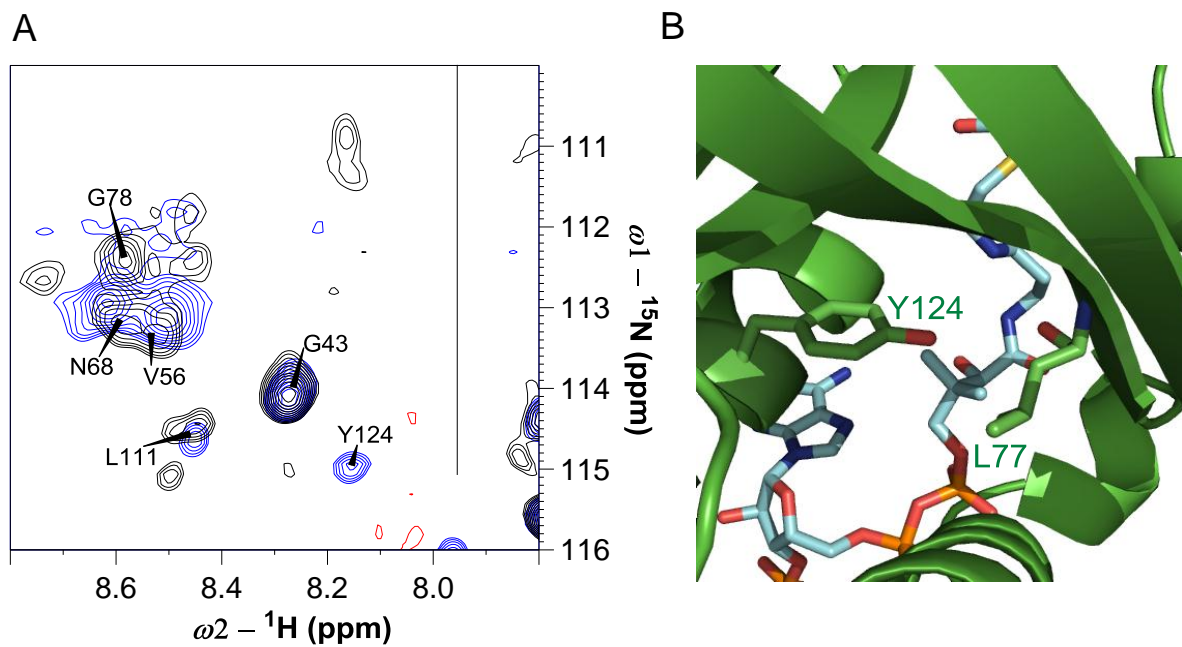

Fig. S9.

Amino acids involved in the substrate binding (PDB ID 2OB0). Leu77, the residue that is most affected by the addition of acetyl-CoA (blue), is closest to the cysteamine moiety, whereas Val29 and Ile142 change chemical shifts most likely as an effect of an “induced fit” response. Tyr73 and His112 are supposedly involved in the catalytic activity and are part of the hydrophobic pocket that binds to the peptide substrate. The figure was created with the PyMOL Molecular Graphics System, Version 1.3, Schrödinger, LLC.

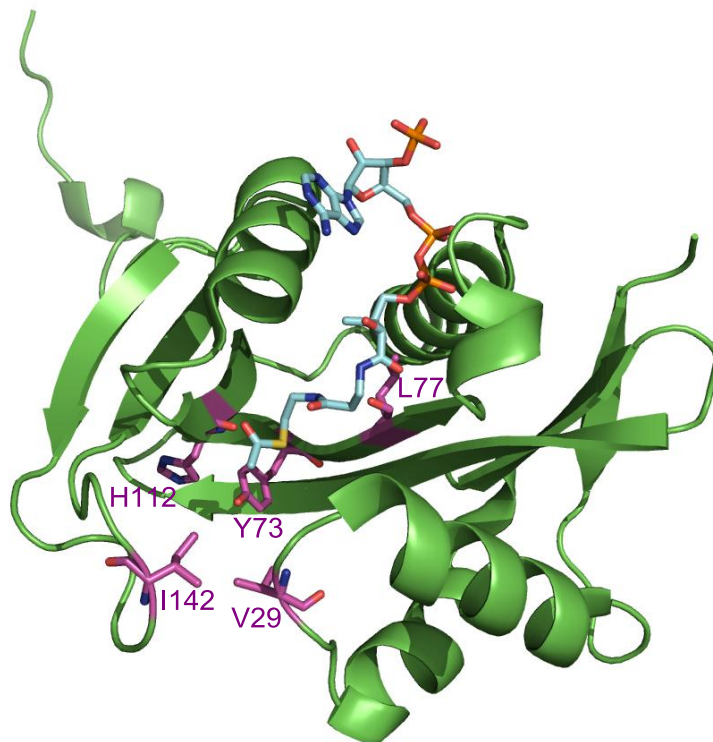

**Table S1: Acquisition parameters of NMR-experiments**

| Experiment                           | Acquisition |       | Resonances     |                |                                | Complex points |     |     | Carrier $\nu$ (ppm) |       |       | Spectral width (ppm) |      |      |
|--------------------------------------|-------------|-------|----------------|----------------|--------------------------------|----------------|-----|-----|---------------------|-------|-------|----------------------|------|------|
|                                      | time (hrs)  | Scans | X              | Y              | Z                              | X              | Y   | Z   | X                   | Y     | Z     | X                    | Y    | Z    |
| HNCO                                 | 8           | 4     | H <sup>N</sup> | N <sup>H</sup> | C <sup>α</sup>                 | 2048           | 32  | 48  | 4.68                | 118.0 | 174.0 | 16.3                 | 32.1 | 80.0 |
| HN(CA)CO                             | 12          | 4     | H <sup>N</sup> | N <sup>H</sup> | C <sup>α</sup>                 | 2048           | 48  | 45  | 4.68                | 118.0 | 174.0 | 16.3                 | 32.1 | 80.0 |
| HNCA                                 | 20          | 8     | H <sup>N</sup> | N <sup>H</sup> | C <sup>α</sup>                 | 2048           | 32  | 60  | 4.68                | 118.0 | 56.0  | 16.3                 | 32.1 | 30.0 |
| HN(CO)CA                             | 20          | 8     | H <sup>N</sup> | N <sup>H</sup> | C <sup>α</sup>                 | 2048           | 32  | 60  | 4.68                | 118.0 | 56.0  | 16.3                 | 32.1 | 30.0 |
| CBCA(CO)NH                           | 48          | 8     | H <sup>N</sup> | N <sup>H</sup> | C <sup>α</sup> /C <sup>β</sup> | 2048           | 47  | 96  | 4.68                | 118.0 | 46.0  | 16.3                 | 32.1 | 18.7 |
| HNCACB                               | 48          | 8     | H <sup>N</sup> | N <sup>H</sup> | C <sup>α</sup> /C <sup>β</sup> | 2048           | 47  | 96  | 4.68                | 118.0 | 46.0  | 16.3                 | 32.1 | 18.7 |
| CC(CO)NH                             | 81          | 32    | H <sup>N</sup> | N <sup>H</sup> | C <sup>ali</sup>               | 2048           | 32  | 144 | 4.68                | 117.0 | 36.2  | 12.0                 | 30.0 | 70.0 |
| <sup>1</sup> H- <sup>15</sup> N HSQC | 1           | 32    | H <sup>N</sup> | N <sup>H</sup> |                                | 2048           | 128 |     | 4.68                | 117.0 |       | 12.0                 | 30.0 |      |
| <sup>1</sup> H- <sup>15</sup> N HMQC | 0.3         | 64    | H <sup>N</sup> | N <sup>H</sup> |                                | 700            | 128 |     | 4.68                | 117.0 |       | 12.0                 | 30.0 |      |
| MUSIC <sup>†</sup> :                 |             |       |                |                |                                |                |     |     |                     |       |       |                      |      |      |
| A <i>i</i> +1                        | 9           | 288   | H <sup>N</sup> | N <sup>H</sup> |                                | 2048           | 64  |     | 4.68                | 117.0 |       | 12.0                 | 30.0 |      |
| S <i>i</i> +1                        | 2           | 96    | H <sup>N</sup> | N <sup>H</sup> |                                | 2048           | 48  |     | 4.68                | 117.0 |       | 12.0                 | 30.0 |      |
| DNG <i>i</i> +1                      | 6           | 192   | H <sup>N</sup> | N <sup>H</sup> |                                | 2048           | 64  |     | 4.68                | 117.0 |       | 12.0                 | 30.0 |      |
| EQG <i>i</i> +1                      | 5           | 160   | H <sup>N</sup> | N <sup>H</sup> |                                | 2048           | 64  |     | 4.68                | 117.0 |       | 12.0                 | 30.0 |      |
| EQG <i>i,i</i> +1                    | 10          | 320   | H <sup>N</sup> | N <sup>H</sup> |                                | 2048           | 64  |     | 4.68                | 117.0 |       | 12.0                 | 30.0 |      |
| VIA <i>i</i> +1                      | 22          | 720   | H <sup>N</sup> | N <sup>H</sup> |                                | 2048           | 64  |     | 4.68                | 117.0 |       | 12.0                 | 30.0 |      |
| VIA <i>i,i</i> +1                    | 23          | 768   | H <sup>N</sup> | N <sup>H</sup> |                                | 2048           | 64  |     | 4.68                | 117.0 |       | 12.0                 | 30.0 |      |

<sup>†</sup> Interpretation of the acronyms of the amino acid edited pulse programmes (MUSIC): *i*+1 defines the succeeding residue to a certain type of amino acid, e.g. A *i*+1 yields a 2D <sup>1</sup>H-<sup>15</sup>N HSQC spectrum containing only residues following alanine, while *i,i*+1 results in spectra containing both signals of the selected amino acid(s) and, very weakly, of their successors.

**Table S2:  $^{13}\text{C}$ ,  $^{15}\text{N}$  and  $^1\text{H}$  resonance assignments for hNaa50p with acetyl-CoA at pH 7.4 and 310 K.**

| Residue | $\text{N}^{\text{H}}$ | $\text{H}^{\text{N}}$ | $\text{C}'$ | $\text{C}^{\alpha}$ | $\text{C}^{\beta}$ | Others                                                   |
|---------|-----------------------|-----------------------|-------------|---------------------|--------------------|----------------------------------------------------------|
| M1      |                       |                       |             |                     |                    |                                                          |
| K2      |                       |                       |             |                     |                    |                                                          |
| G3      |                       |                       | 174.1       | 45.2                |                    |                                                          |
| S4      | 116.2                 | 8.09                  | 173.4       | 57.5                | 64.0               |                                                          |
| R5      | 123.4                 | 8.18                  | 175.0       | 55.9                | 31.0               | $\text{C}^{\gamma}$ 27.6, $\text{C}^{\delta}$ 43.1       |
| I6      | 125.0                 | 8.34                  | 175.6       | 60.1                | 39.2               | $\text{C}^{\delta}$ 18.0                                 |
| E7      | 125.9                 | 8.75                  | 174.4       | 54.2                | 34.2               | $\text{C}^{\gamma}$ 35.8                                 |
| L8      | 120.7                 | 8.84                  | 177.4       | 52.8                | 42.3               | $\text{C}^{\delta}$ 26.9, 26.3                           |
| G9      | 109.3                 | 9.58                  | 172.2       | 44.0                |                    |                                                          |
| D10     | 119.8                 | 8.42                  | 176.4       | 54.9                | 41.1               |                                                          |
| V11     | 123.2                 | 9.15                  | 175.2       | 62.2                | 31.5               | $\text{C}^{\gamma}$ 22.4, 21.6                           |
| T12     | 120.2                 | 9.67                  | 173.4       | 58.8                | 69.7               | $\text{C}^{\gamma}$ 21.1                                 |
| P13     |                       |                       |             |                     |                    |                                                          |
| H14     |                       |                       | 176.6       | 56.9                | 30.6               |                                                          |
| N15     | 115.5                 | 7.79                  | 178.3       | 52.6                | 38.7               |                                                          |
| I16     | 121.2                 | 7.62                  | 176.6       | 63.0                | 37.7               | $\text{C}^{\gamma}$ 17.7, $\text{C}^{\delta}$ 15.0       |
| K17     | 120.6                 | 8.36                  | 179.2       | 59.6                | 31.7               | $\text{C}^{\gamma}$ 24.5, $\text{C}^{\epsilon}$ 41.6     |
| Q18     | 118.8                 | 7.74                  | 178.2       | 58.3                | 28.1               |                                                          |
| L19     | 120.5                 | 7.42                  | 177.5       | 58.5                | 41.5               | $\text{C}^{\gamma}$ 27.0, $\text{C}^{\delta}$ 21.4, 20.3 |
| K20     | 117.9                 | 8.06                  | 178.4       | 59.8                | 32.1               | $\text{C}^{\epsilon}$ 41.2                               |
| R21     | 117.9                 | 7.56                  | 178.7       | 59.0                | 29.8               | $\text{C}^{\delta}$ 43.1                                 |
| L22     | 118.7                 | 8.01                  | 178.9       | 58.0                | 41.9               | $\text{C}^{\gamma}$ 30.0, $\text{C}^{\delta}$ 27.0, 25.7 |
| N23     | 117.9                 | 8.63                  | 179.0       | 55.4                | 36.6               |                                                          |
| Q24     | 118.7                 | 8.21                  | 177.3       | 58.4                | 28.4               |                                                          |
| V25     | 115.5                 | 7.47                  | 177.9       | 64.3                | 32.5               | $\text{C}^{\gamma}$ 21.8                                 |
| I26     | 118.5                 | 8.06                  | 178.9       | 66.0                | 39.6               |                                                          |
| F27     | 117.6                 | 8.43                  |             | 57.0                | 40.1               |                                                          |
| P28     |                       |                       | 176.0       | 63.5                | 30.9               |                                                          |
| V29     | 116.5                 | 6.96                  | 174.3       | 60.3                | 33.6               | $\text{C}^{\gamma}$ 22.8, 20.0                           |
| S30     |                       |                       | 173.7       | 57.5                | 63.6               |                                                          |
| Y31     | 124.5                 | 8.09                  | 176.8       | 58.0                |                    |                                                          |
| N32     |                       |                       |             |                     |                    |                                                          |
| D33     |                       |                       | 178.8       | 57.7                | 40.4               |                                                          |
| K34     | 120.9                 | 8.12                  | 177.4       | 59.1                | 32.2               | $\text{C}^{\epsilon}$ 42.2                               |
| F35     | 119.9                 | 7.78                  | 179.3       | 61.2                | 38.6               |                                                          |
| Y36     |                       |                       |             |                     |                    |                                                          |
| K37     |                       |                       | 179.1       | 58.8                | 32.3               |                                                          |
| D38     | 120.4                 | 8.37                  | 179.9       | 57.0                | 39.5               |                                                          |
| V39     | 117.5                 | 7.70                  | 176.4       | 64.8                | 31.8               | $\text{C}^{\gamma}$ 22.4, 21.4                           |
| L40     | 117.4                 | 7.11                  | 178.1       | 56.2                | 41.4               | $\text{C}^{\delta}$ 25.8                                 |
| E41     | 115.9                 | 7.71                  | 177.9       | 56.3                | 30.5               | $\text{C}^{\gamma}$ 35.8                                 |
| V42     | 111.6                 | 7.16                  | 177.3       | 61.9                | 31.7               | $\text{C}^{\gamma}$ 20.5, 19.3                           |
| G43     | 113.9                 | 8.28                  | 175.7       | 47.1                |                    |                                                          |
| E44     | 122.1                 | 8.84                  | 175.3       | 58.0                | 29.7               | $\text{C}^{\gamma}$ 35.7                                 |
| L45     | 118.2                 | 7.32                  | 174.2       | 56.0                | 40.8               | $\text{C}^{\gamma}$ 28.1, $\text{C}^{\delta}$ 25.5, 23.5 |
| A46     | 121.5                 | 7.89                  | 175.9       | 50.8                | 22.0               |                                                          |
| K47     | 117.2                 | 8.84                  | 175.7       | 53.3                | 37.1               |                                                          |
| L48     | 119.7                 | 8.58                  | 174.7       | 54.1                | 45.3               | $\text{C}^{\gamma}$ 25.4                                 |
| A49     | 122.6                 | 8.32                  | 175.2       | 50.3                | 21.3               |                                                          |
| Y50     | 120.9                 | 9.30                  | 174.6       | 56.6                | 41.8               |                                                          |
| F51     | 123.0                 | 9.05                  | 175.3       | 56.0                | 42.5               |                                                          |
| N52     | 126.4                 | 9.03                  | 174.2       | 54.6                | 36.5               |                                                          |
| D53     | 109.2                 | 8.96                  | 174.8       | 56.6                | 39.7               |                                                          |
| I54     | 122.0                 | 8.07                  | 175.7       | 60.1                | 46.2               | $\text{C}^{\gamma}$ 26.6                                 |
| A55     | 130.5                 | 8.76                  | 176.9       | 52.2                | 17.3               |                                                          |
| V56     | 113.3                 | 8.48                  | 174.4       | 60.2                | 34.9               | $\text{C}^{\gamma}$ 19.9, 18.7                           |
| G57     | 108.0                 | 7.75                  | 170.2       | 46.1                |                    |                                                          |
| A58     | 119.0                 | 8.58                  | 175.7       | 52.7                | 23.7               |                                                          |
| V59     | 119.0                 | 8.85                  | 172.8       | 58.0                | 33.6               |                                                          |
| C60     |                       |                       |             |                     |                    |                                                          |
| C61     |                       |                       | 171.4       | 56.5                | 31.8               |                                                          |
| R62     | 116.2                 | 9.07                  | 173.7       | 54.8                | 34.3               | $\text{C}^{\delta}$ 43.7                                 |
| V63     | 123.3                 | 8.87                  | 175.0       | 63.4                | 31.8               | $\text{C}^{\gamma}$ 21.6                                 |
| D64     | 129.4                 | 9.42                  | 174.7       | 53.0                | 43.8               |                                                          |
| H65     | 125.0                 | 8.75                  | 175.1       | 55.3                | 30.3               |                                                          |

**Table S2: continued**

| Residue | N <sup>H</sup> | H <sup>N</sup> | C <sup>γ</sup> | C <sup>α</sup> | C <sup>β</sup> | Others                                         |
|---------|----------------|----------------|----------------|----------------|----------------|------------------------------------------------|
| S66     | 117.8          | 8.23           | 174.4          | 57.7           | 64.4           |                                                |
| Q67     | 122.1          | 8.12           | 175.3          | 56.4           | 26.9           |                                                |
| N68     | 112.9          | 8.57           | 174.4          | 54.4           | 37.8           |                                                |
| Q69     | 117.5          | 7.75           | 174.1          | 54.6           | 32.7           | C <sup>γ</sup> 33.8                            |
| K70     | 125.2          | 9.40           | 175.0          | 56.3           | 33.3           |                                                |
| R71     | 125.6          | 8.99           | 174.5          | 53.8           | 34.9           | C <sup>δ</sup> 43.8                            |
| L72     | 125.7          | 8.88           | 173.8          | 53.2           | 41.8           | C <sup>γ</sup> 27.3, C <sup>δ</sup> 25.8, 24.5 |
| Y73     | 128.1          | 9.28           | 175.8          | 54.4           | 39.8           |                                                |
| I74     | 127.9          | 8.08           | 172.6          | 61.2           | 37.4           | C <sup>γ</sup> 21.8, 18.0, C <sup>δ</sup> 13.7 |
| M75     | 122.9          | 9.02           | 176.6          | 57.9           | 33.6           |                                                |
| T76     | 106.5          | 7.70           | 172.4          | 59.9           | 70.6           | C <sup>γ</sup> 16.9                            |
| L77     | 124.2          | 6.86           | 176.0          | 57.4           | 42.8           |                                                |
| G78     | 112.5          | 8.60           | 170.1          | 46.6           |                |                                                |
| C79     | 116.1          | 8.95           |                | 55.5           | 31.5           |                                                |
| L80     | 125.2          | 8.88           | 176.1          | 52.9           | 44.0           |                                                |
| A81     | 119.8          | 9.23           | 174.2          | 54.5           | 17.3           |                                                |
| P82     |                |                | 176.1          | 64.6           | 30.5           | C <sup>δ</sup> 50.4                            |
| Y83     | 114.6          | 7.84           | 173.1          | 56.6           | 37.9           |                                                |
| R84     | 117.8          | 6.67           | 175.1          | 57.0           | 31.4           |                                                |
| R85     | 117.0          | 9.52           | 176.2          | 57.3           |                |                                                |
| L86     |                |                | 178.1          | 53.6           | 43.7           | C <sup>δ</sup> 26.3, 25.5                      |
| G87     | 111.6          | 9.57           | 177.2          | 45.2           |                |                                                |
| I88     | 125.5          | 9.35           | 178.0          | 66.4           | 35.8           | C <sup>γ</sup> 29.0                            |
| G89     | 112.6          | 9.69           | 176.6          | 47.8           |                |                                                |
| T90     | 121.0          | 9.45           | 175.5          | 68.9           |                | C <sup>γ</sup> 21.0                            |
| K91     | 122.5          | 7.86           | 180.2          | 59.7           | 31.9           | C <sup>ε</sup> 41.8                            |
| M92     | 117.7          | 8.27           | 177.2          | 61.1           | 34.4           |                                                |
| L93     | 120.7          | 8.99           | 178.8          | 57.2           | 40.7           | C <sup>δ</sup> 25.6, 22.6                      |
| N94     | 117.8          | 9.08           | 178.2          | 56.2           | 37.6           |                                                |
| H95     | 120.5          | 7.65           | 176.7          | 60.5           | 30.3           |                                                |
| V96     | 118.1          | 7.40           | 178.0          | 66.6           | 31.4           | C <sup>γ</sup> 22.5                            |
| L97     | 119.4          | 8.73           | 179.7          | 58.5           | 40.1           | C <sup>δ</sup> 26.0                            |
| N98     | 119.1          | 8.34           | 177.7          | 56.4           | 38.4           |                                                |
| I99     | 120.5          | 7.83           | 179.5          | 64.5           | 38.1           | C <sup>γ</sup> 27.7, C <sup>δ</sup> 16.6       |
| C100    | 117.4          | 7.73           | 177.7          | 63.8           | 26.7           |                                                |
| E101    | 122.9          | 8.54           | 178.4          | 59.3           | 29.3           | C <sup>γ</sup> 35.8                            |
| K102    | 117.7          | 8.01           | 177.8          | 58.4           | 32.1           | C <sup>γ</sup> 24.7, C <sup>ε</sup> 41.6       |
| D103    | 119.0          | 7.66           | 177.7          | 56.8           | 43.2           |                                                |
| G104    | 102.8          | 8.17           | 176.4          | 46.4           |                |                                                |
| T105    | 111.1          | 9.04           | 175.0          | 61.9           | 69.5           | C <sup>γ</sup> 21.0                            |
| F106    | 120.2          | 8.30           | 176.0          | 59.2           | 40.0           |                                                |
| D107    | 119.9          | 9.67           | 177.0          | 57.4           | 43.4           |                                                |
| N108    | 108.3          | 7.55           | 171.8          | 52.9           | 41.1           |                                                |
| I109    | 118.0          | 8.27           | 174.4          | 58.8           | 45.9           |                                                |
| Y110    | 126.4          | 9.75           | 171.2          | 55.9           | 42.0           |                                                |
| L111    | 114.6          | 8.50           | 174.1          | 55.6           | 43.2           | C <sup>δ</sup> 26.0                            |
| H112    |                |                | 175.6          | 56.0           | 33.8           |                                                |
| V113*   | 127.8          | 7.86           |                | 57.6           |                |                                                |
| Q114    |                |                | 179.2          | 57.5           | 30.0           |                                                |
| I115    | 116.4          | 7.65           | 175.0          | 64.8           |                | C <sup>δ</sup> 16.3                            |
| S116*   | 109.6          | 7.06           | 175.6          | 57.4           | 63.3           |                                                |
| N117    | 123.7          | 8.02           | 175.0          | 51.3           | 36.4           |                                                |
| E118    | 124.0          | 8.10           | 178.4          | 59.8           | 29.8           |                                                |
| S119    | 113.4          | 8.79           | 177.2          | 61.3           | 62.4           |                                                |
| A120    | 122.7          | 7.39           | 178.7          | 54.8           | 19.9           |                                                |
| I121    | 118.9          | 8.10           | 177.5          | 67.0           | 38.1           | C <sup>γ</sup> 25.7, 22.9, C <sup>δ</sup> 14.3 |
| D122    | 118.2          | 8.33           | 178.2          | 57.8           | 40.8           |                                                |
| F123    | 119.6          | 7.46           | 176.2          | 61.0           | 38.7           |                                                |
| Y124    | 114.7          | 8.23           | 180.5          | 63.4           | 36.9           |                                                |
| R125    | 121.9          | 8.79           | 180.5          | 60.0           | 29.7           | C <sup>γ</sup> 27.8, C <sup>δ</sup> 43.5       |
| K126    | 119.9          | 7.42           | 177.6          | 59.0           | 31.3           | C <sup>ε</sup> 41.5                            |
| F127    | 116.1          | 7.56           | 175.7          | 57.7           | 39.6           |                                                |
| G128    | 106.7          | 8.05           | 174.8          | 45.9           |                |                                                |
| F129    | 118.1          | 7.67           | 175.1          | 58.1           | 39.9           |                                                |
| E130    | 119.2          | 8.54           | 175.7          | 53.8           | 33.3           | C <sup>γ</sup> 35.8                            |

**TableS2: continued**

| Residue           | N <sup>H</sup> | H <sup>N</sup> | C <sup>γ</sup> | C <sup>α</sup> | C <sup>β</sup> | Others                                         |
|-------------------|----------------|----------------|----------------|----------------|----------------|------------------------------------------------|
| I131              | 123.0          | 8.97           | 177.5          | 62.6           | 38.0           | C <sup>γ</sup> 27.6, C <sup>δ</sup> 17.5       |
| I132              | 123.5          | 8.80           | 175.6          | 61.0           | 39.4           | C <sup>γ</sup> 26.5, C <sup>δ</sup> 18.2       |
| E133              | 119.0          | 7.62           | 174.0          | 55.7           | 32.8           |                                                |
| T134              | 120.4          | 8.85           | 173.6          | 62.9           | 70.7           | C <sup>γ</sup> 21.3                            |
| K135              | 128.5          | 9.76           | 175.3          | 53.7           | 33.0           | C <sup>ε</sup> 41.3                            |
| K136              | 125.4          | 8.71           | 178.1          | 55.1           | 31.8           | C <sup>δ</sup> 24.3, C <sup>ε</sup> 41.3       |
| N137              | 118.8          | 9.53           | 174.7          | 54.5           | 36.8           |                                                |
| Y138              | 119.5          | 7.26           | 176.6          | 61.0           | 40.4           |                                                |
| Y139              | 117.1          | 8.81           | 175.8          | 57.4           | 39.9           |                                                |
| K140              |                |                |                |                |                |                                                |
| R141              |                |                | 175.4          | 57.4           | 29.7           | C <sup>δ</sup> 42.9                            |
| I142              | 113.6          | 7.23           | 173.5          | 60.1           | 40.7           | C <sup>γ</sup> 25.7, C <sup>δ</sup> 17.8       |
| E143              | 119.4          | 7.98           | 175.0          | 52.6           | 32.4           |                                                |
| P144              |                |                | 176.5          | 62.9           |                |                                                |
| A145              | 123.2          | 8.90           | 177.6          | 52.9           | 20.6           |                                                |
| D146              | 118.8          | 7.22           | 174.6          | 54.5           | 41.7           |                                                |
| A147              | 121.5          | 8.68           | 177.4          | 50.0           | 23.9           |                                                |
| H148              | 119.4          | 9.13           | 175.7          | 54.8           | 33.3           |                                                |
| V149              | 121.3          | 8.88           | 175.8          | 61.5           | 32.0           | C <sup>γ</sup> 20.9                            |
| L150              | 128.1          | 8.79           | 176.1          | 52.7           | 43.8           |                                                |
| Q151              |                |                | 174.3          | 54.5           | 34.0           |                                                |
| K152              | 130.6          | 9.08           | 174.8          | 54.1           | 34.0           |                                                |
| N153              | 127.1          | 8.91           | 175.2          | 53.7           | 38.6           |                                                |
| L154              | 123.2          | 8.08           | 176.9          | 54.8           | 42.0           | C <sup>γ</sup> 27.2, C <sup>δ</sup> 21.9, 20.8 |
| K155              | 120.2          | 8.06           | 176.0          | 55.5           | 33.0           | C <sup>γ</sup> 24.0, C <sup>ε</sup> 42.0       |
| V156              | 122.3          | 8.05           | 174.6          | 59.7           | 32.1           |                                                |
| P157 <sup>‡</sup> |                |                | 176.9          | 63.4           | 32.2           | C <sup>δ</sup> 50.9                            |
| S158              | 116.4          | 8.40           | 175.3          | 58.5           | 63.9           |                                                |
| G159              | 111.0          | 8.45           | 173.9          | 45.4           |                |                                                |
| Q160              | 119.9          | 8.17           | 174.9          | 55.7           | 29.5           | C <sup>γ</sup> 33.9                            |
| N161              | 125.4          | 8.05           | 173.9          | 53.3           | 39.9           |                                                |
| A162              | 129.6          | 7.83           | 182.4          | 53.6           | 19.8           |                                                |
| D163              |                |                |                |                |                |                                                |
| V164              |                |                |                |                |                |                                                |
| Q165              |                |                |                |                |                |                                                |
| K166              |                |                |                |                |                |                                                |
| T167              |                |                |                |                |                |                                                |
| D168              |                |                |                |                |                |                                                |
| N169              |                |                |                |                |                |                                                |

\* Ambiguous assignment.

<sup>‡</sup> P157 is present in both cis- and trans-conformation, thus all following amino acids have two NH-peaks. Only the stronger trans-peaks are shown in the table.
